# Supplementary material for: Immunomodulatory Effect of Green Tea Treatment in Combination with Low-dose Chemotherapy in Elderly Acute Myeloid Leukemia Patients with Myelodysplasia-related Changes
Source: PubMed Central journal article supplement — Integr Cancer Ther. 2021 Mar 23;20:15347354211002647. doi: 10.1177/15347354211002647 (PMC7995304; doi:10.1177/15347354211002647), 2021-03-23
Supplement: sj-pdf-1-ict-10.1177_15347354211002647.pdf [file sj-pdf-1-ict-10.1177_15347354211002647.pdf]

## SUPPLEMENTARY MATERIAL

**Supplementary Table S1.** Sequence and concentration of primers used for qPCR.

| <b>Gene</b>                   | <b>Forward primer</b>  | <b>Reverse primer</b> | <b>Concentration</b> |
|-------------------------------|------------------------|-----------------------|----------------------|
| <i>TGF<math>\beta</math></i>  | GCGTGCTAATGGTGGAAACC   | GCTTCTCGGAGCTCTGATGTG | 150nM                |
| <i>IL-1<math>\beta</math></i> | ACCTGAGCACCTTCTTTCCC   | TCGTGCACATAAGCCTCGTT  | 300nM                |
| <i>IL-4</i>                   | TAGGCTGAAAGGGGGAAAGC   | CTGTTCACCTCAACTGCTCC  | 600nM                |
| <i>TNF-</i>                   | GCTGTACCTTATCTACTCCC   | CTCCTGGTATGAAATGGC    | 600nM                |
| <i>HPRT</i>                   | GAACGTCTTGCTCGAGATGTGA | TCCAGCAGGTCAGCAAAGAAT | 150nM                |

**Supplementary Table S2** Characteristics of patients.

| <b>Patient</b> | <b>Age/Sex</b> | <b>Cytogenetics</b>   | <b>Chemotherapy combined with green tea</b> | <b>Time of therapy before cytarabine (days)</b> | <b>Time under green tea therapy (days)</b> | <b>Number of hospitalizations</b> | <b>Total days at hospital</b> |
|----------------|----------------|-----------------------|---------------------------------------------|-------------------------------------------------|--------------------------------------------|-----------------------------------|-------------------------------|
| <b>#1</b>      | 79/M           | 46XY, del(9) (q31-34) | No                                          | -                                               | 425                                        | 1                                 | 28                            |
| <b>#2</b>      | 80/F           | COMPLEX               | No                                          | -                                               | 229                                        | 1                                 | 13                            |
| <b>#3</b>      | 76/M           | 46XY                  | Yes                                         | 150                                             | 657                                        | 1                                 | 10                            |
| <b>#4</b>      | 87/M           | COMPLEX               | Yes                                         | 60                                              | 303                                        | 1                                 | 7                             |
| <b>#5</b>      | 70/F           | 48XX, +4, +14         | Yes                                         | 60                                              | 832                                        | 3                                 | 36                            |
| <b>#6</b>      | 68/F           | 46XX                  | No                                          | -                                               | 413                                        | 4                                 | 58                            |
| <b>#7</b>      | 84/M           | 48XY, +8              | No                                          | -                                               | 50                                         | 1                                 | 5                             |
| <b>#8</b>      | 64/M           | COMPLEX               | No                                          | -                                               | 49                                         | 1                                 | 6                             |
| <b>#9</b>      | 78/M           | Na                    | Yes                                         | 60                                              | 226                                        | 2                                 | 50                            |
| <b>#10</b>     | 68/M           | 46XY                  | Yes                                         | 60                                              | 72                                         | 1                                 | 7                             |

During the study, three patients passed away before completing the study (patients #7, #8, #10). Low-dose cytarabine was introduced in patients at day 60 (n=4; patient #4, #5, #9, #10) and at day 150 (n=1; patient #3); however, one patient lacked in measurements (patient #9) and one patient passed away before completing treatment (patient #10). Three patients did not need to receive low-dose cytarabine during this study being treated with green tea alone (patient #1, #2, #6); however, one patient lacked in measurements (patient #6).
